# Supplementary material for: In Vitro Characterization of the Human Skeletal Stem Cell-like Properties of Primary Bone-Derived Mesenchymal Stem/Stromal Cells in Patients with Late and Early Hip Osteoarthritis
Source: MDPI journal article supplement (doi:10.3390/life12060899), 2022-06-15
Supplement: s1 [file s1]

# Supplementary Figures.

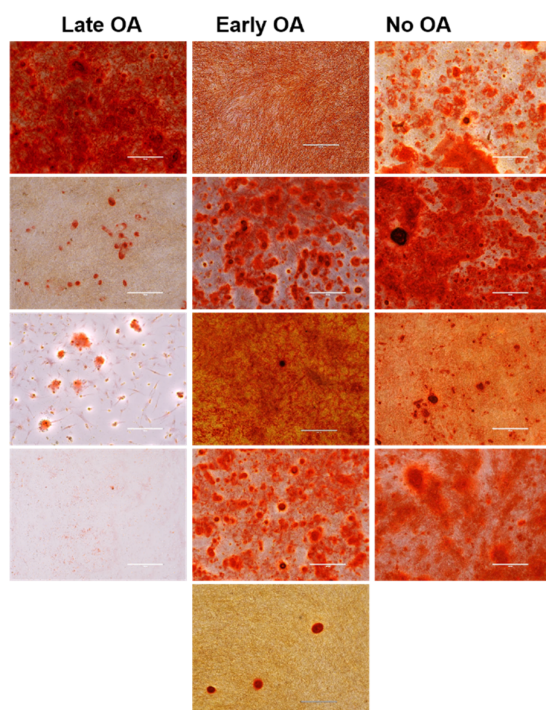

**Supplemental Figure S1.** The images of the wells for each donor in all groups (as indicated) stained with Alizarin red S for osteogenesis. Scale bars, 400  $\mu$ m. OA, osteoarthritis.

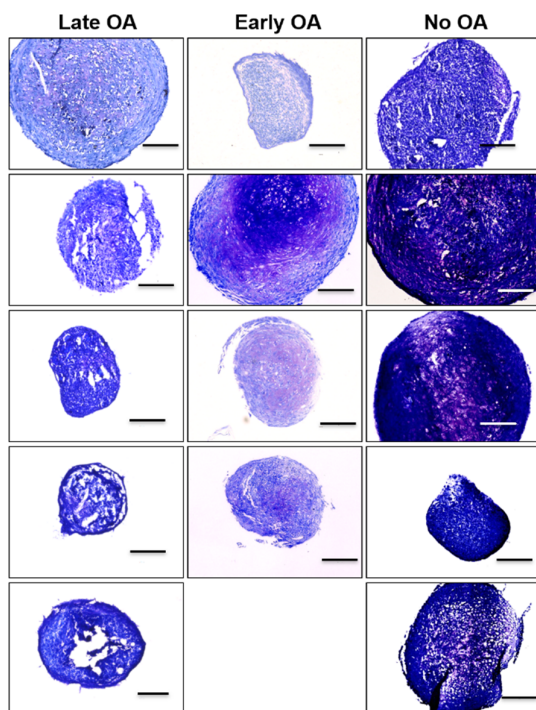

**Supplemental Figure S2.** The images of the wells for each donor in all groups (as indicated) stained with Toluidine blue for chondrogenesis. Scale bars, 200  $\mu$ m. OA, osteoarthritis.

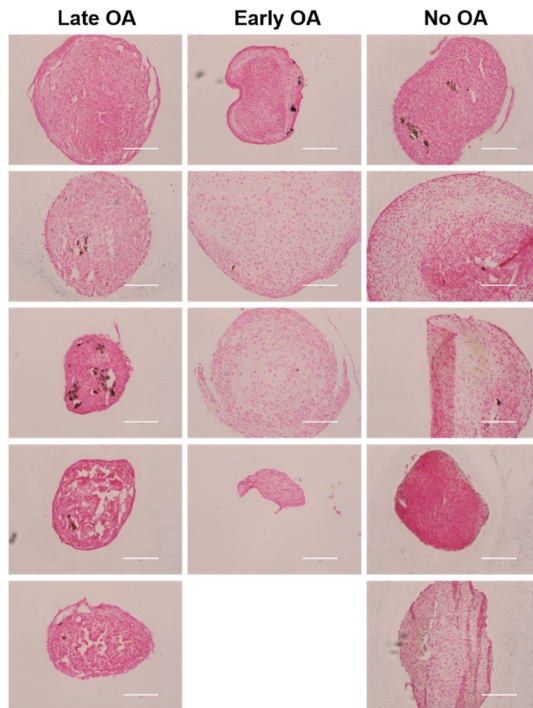

**Supplemental Figure S3.** The images of the wells for each donor in all groups (as indicated) stained with von Kossa for the mineralization rate in chondrogenesis. Scale bars, 200  $\mu$ m. OA, osteoarthritis.

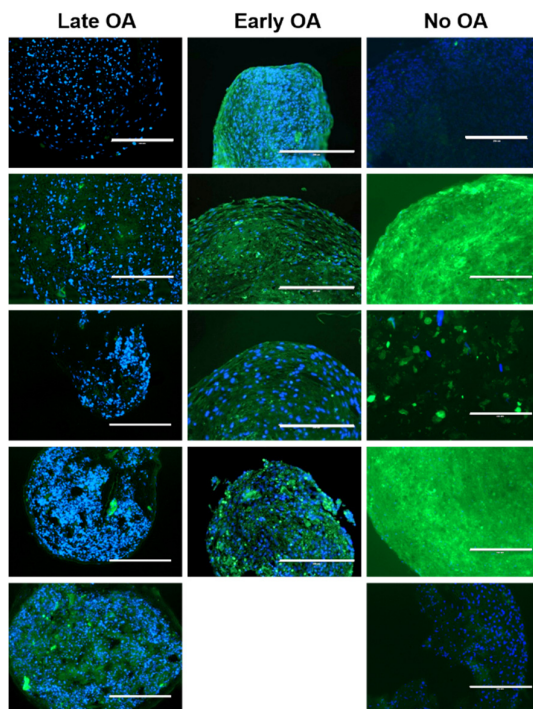

**Supplemental Figure S4.** The images of the wells for each donor in all groups (as indicated) showing immunofluorescence for the  $\alpha$ -1 chain of type II collagen (Col2A1). Scale bars, 200  $\mu$ m. OA, osteoarthritis.

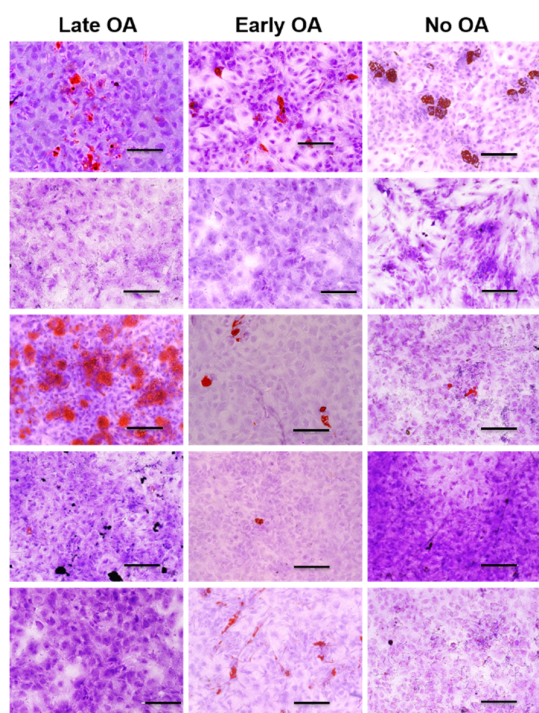

**Supplemental Figure S5.** The images of the wells for each donor in all groups (as indicated) showing Oil red O stained adipocytes. Scale bars, 200  $\mu$ m. OA, osteoarthritis.
